# Supplementary material for: Rapid, high yield, directed addition of quantum dots onto surface bound linear DNA origami arrays
Source: Royal Society of Chemistry journal article supplement (doi:10.1039/c3cc49637f), 2014-01-01
Supplement: c3cc49637f1.pdf [file c3cc49637f1.pdf]

# Supplementary Material (ESI) for Chemical Communications Manuscript ID CC-COM-12-2013-049637  
# This journal is (c) The Royal Society of Chemistry 2010

# Rapid, High Yield, Directed Addition of Quantum Dots onto Surface Bound Linear DNA Origami Arrays

Masudur Rahman\*, David Neff and Michael L. Norton

Department of Chemistry, Marshall University, West Virginia 25755, USA

## Experimental Section

**Materials:** All staple strands and sticky-end strands were purchased from Integrated DNA Technologies Inc. Single-stranded M13mp18 DNA plasmid was purchased from Bayou Biolabs. Streptavidin (Thermo Scientific), Qdot® 525 Streptavidin Conjugate (Invitrogen) and chemicals were purchased from Aldrich.

**AFM:** All AFM imaging studies were performed with a Bruker Multimode8 and NanoscopeVI controller using SCANASYST-AIR mode. Circular grade V1 mica discs (10 mm, Ted Pella, Inc.) served as substrates.

**Fluorescence microscope (FM):** Fluorescence images were taken with a Rolera-MGi EMCCD camera (QIMAGING), with acquisition parameters: gain 2, EM gain 3500, exp. Time=100msec. A Sapphire (Coherent) 488nm laser (20mW collimated) was used for excitation and launched into a Nikon TE200 inverted epifluorescence microscope. The characteristics of the filters employed were excitation 470/40 nm and emission 515/30 nm.

## Preparation of DNA Origami:

**Single Rectangular DO (srDO):** The sequences of staple strands for srDO were designed using the Parabon inSēquoia™ program.<sup>1</sup> Biotin-labeled staples were used to direct the local binding of, or address, SA or SA-Qdot species. The mixture of staple strands, biotin-labeled staples and M13mp18 ssDNA plasmid was brought to a volume of 50 µl using DO buffer (1×TAE buffer solution containing 40 mM Tris-HCl, pH 8.0, 20 mM Acetic acid, 2.5 mM EDTA, and 10.5 mM Magnesium chloride). The final concentration of M13mp18 ssDNA plasmid in the solution was 10 nM, and the molar ratio of the long viral ssDNA to the staple strands was 1:5. The sample was cooled from 90°C to 16°C over the course of 13h in a thermocycling machine (Primus96, MWG Biotech).<sup>2</sup> Staple sequences are listed at the end of the supporting information.

**One Dimensional Rectangular DO (1DrDO):** To prepare the one dimensional DO, designed sticky-ended strands were employed. The sequences are listed at the end of ESI. The mixture of staple strands, sticky-ended strands, biotin modified strands and M13mp18 ssDNA plasmid was brought to a volume of 50 µl using DO buffer. The final concentration of ssDNA plasmid in the solution was 10 nM, and the molar ratio of the ssDNA plasmid to all the other strands was 1:5. The sample was annealed by cooling as described in the previous procedure.

**Purification of DO:** To remove the excess staple strands, the DO solutions were dialyzed using the drop dialysis method.<sup>3</sup> 50 µl of DO solution was purified using 0.25 µm pore size membrane (Millipore Inc.) by dialysis for 30 min against 10 ml of DO buffer.

## Silanization of glass coverslip (AP-glass):

Indexed cover glass (Eppendorf CELLocate) surfaces were cleaned with 5 minutes of sonication, first in ethanol and then in acetone then dried in a N<sub>2</sub> stream. The substrates were then exposed to a low pressure UV lamp at a distance of ~2-3cm (SEN light Co. UVL-20, Hg lamp, 20 watt with 254nm power = 50µW@1meter) for 5 minutes and finally reacted in an O<sub>2</sub> plasma (100 mtorr ~75% O<sub>2</sub>) for 5 minutes. This cleaned coverslip was immersed in a freshly prepared 1% 3-aminopropyl-trimethoxysilane (APTES) in dry ethanol solution for 10 minutes at room temperature, rinsed by dipping and agitation in an ethanol (~10-20ml) bath, then annealed in an oven for 1hr at 120°C.

## Assembly of SA and SA-Qdot on DO:

10 µl of 1 nM DO was used to cover ~ 1cm<sup>2</sup> of freshly cleaved mica for 5 minutes, then the surface was washed with 400 µl of MilliQ water and immediately blown dry with N<sub>2</sub>. The number density and structural integrity of the immobilized origami were determined using AFM. Mica bound samples were then incubated at room temperature in 10 nM SA or SA-Qdot solutions and brought to a volume of 30 µl using DO buffer. After one minute, the sample was washed with 400µl of DO buffer and then with 400µl of MilliQ water and immediately blown dry with N<sub>2</sub>.

## sQD-1DrDO alignment using the combing method:

To align then immobilize the sQD-1DrDO complex in one direction a moving interface combing technique has been employed.<sup>4</sup> A small drop (typically 5 µl) of complex solution was deposited at the edge of an AP coated glass coverslip substrate. One flat edge of an untreated coverslip was then pressed/touched on top of the drop, forcing the drop to spread by capillary action along the untreated coverslip edge. This interface is slowly moved in one direction (as illustrated in Fig. 4a). After one minute incubation, the sample was wicked dry using an absorbent paper, then subjected to analysis by fluorescence microscopy and AFM analysis.

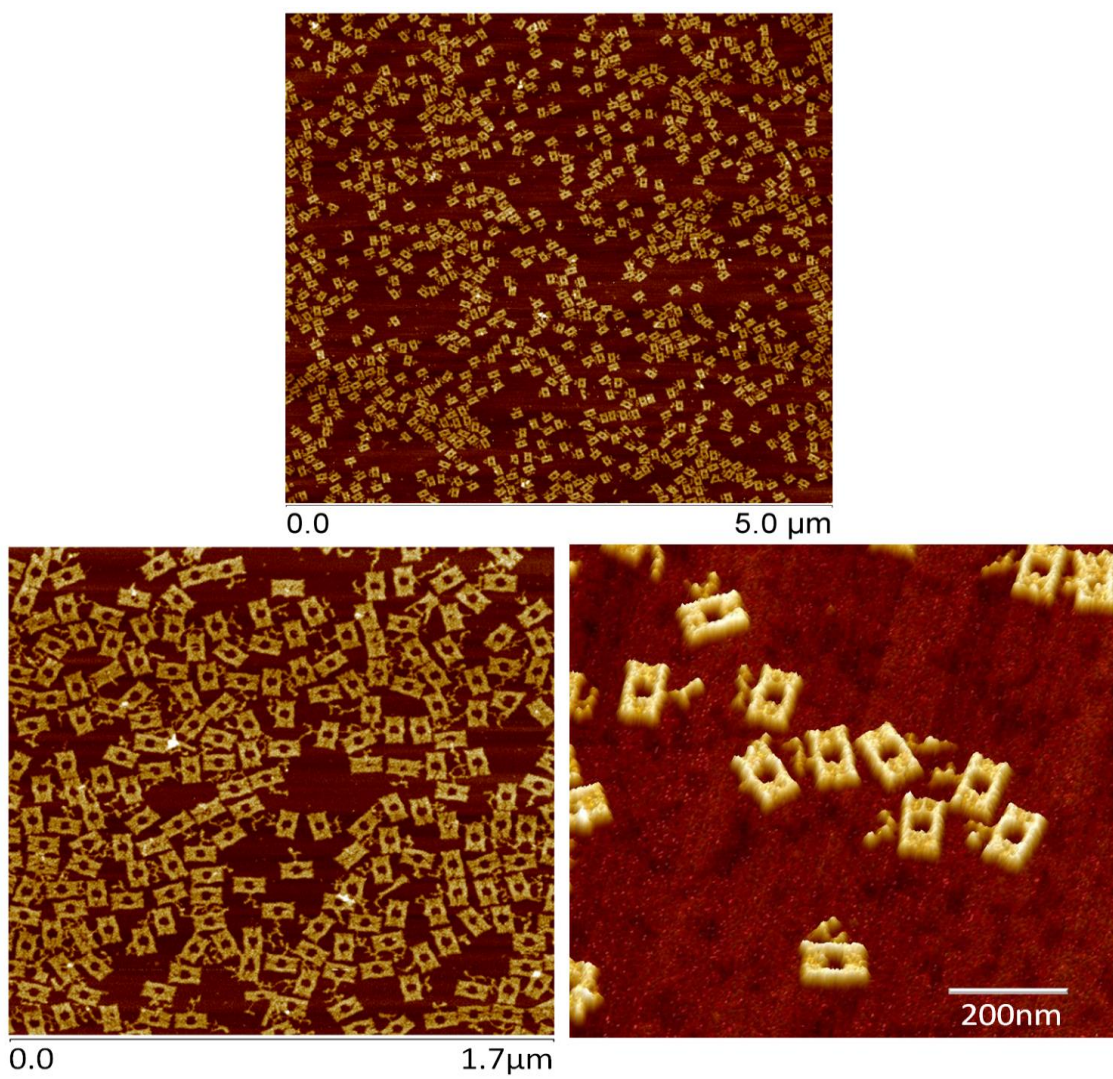

Figure S1: AFM images of single rectangular origami (srDO) platforms on mica

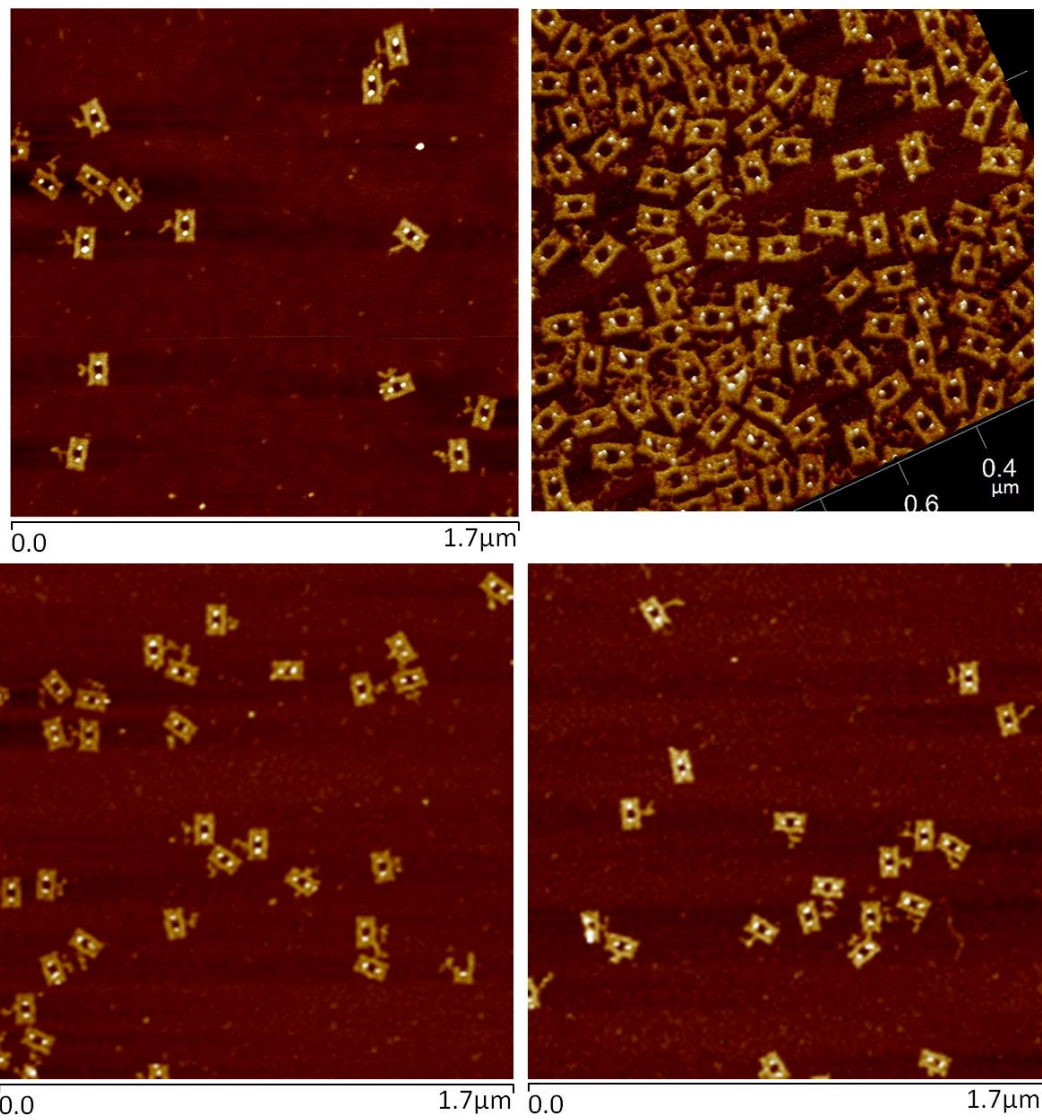

Figure S2: Directed assembly of streptavidin (SA) to addresses on srDO

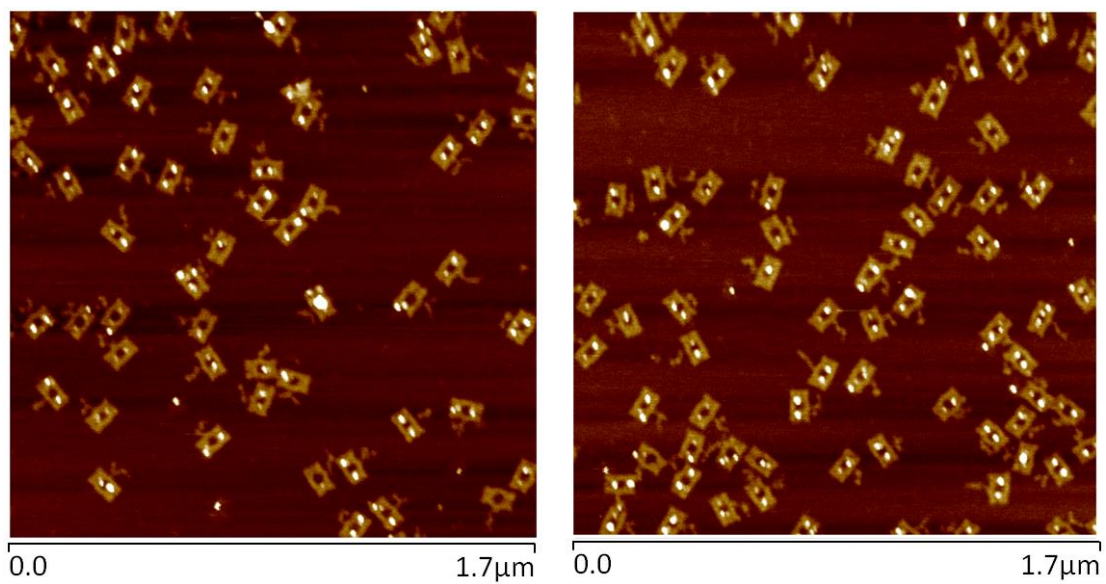

Figure S3: Directed assembly of SA-QDs to addresses on srDO

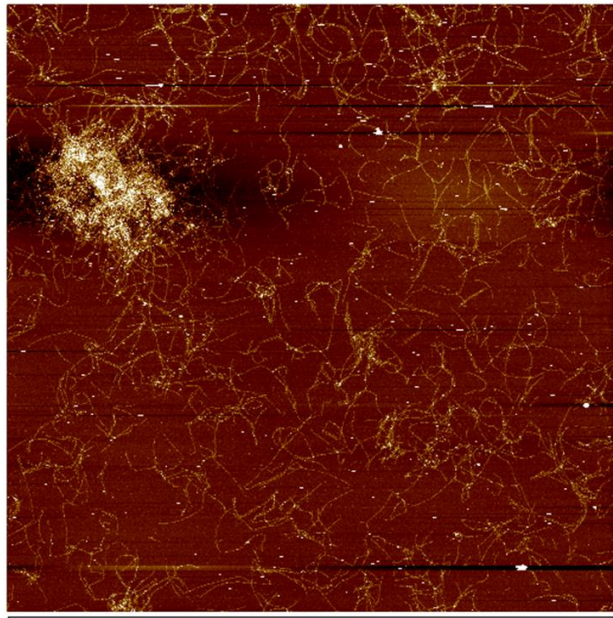

0.0

Height

50.0 μm

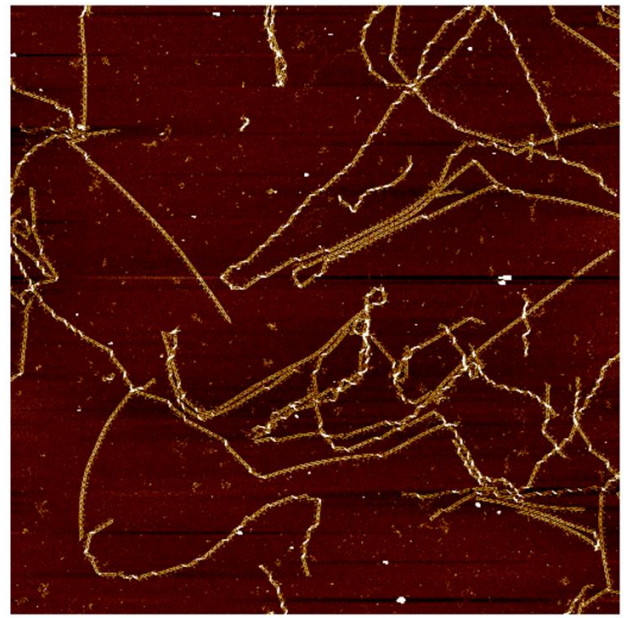

0.0

Height

10.9 μm

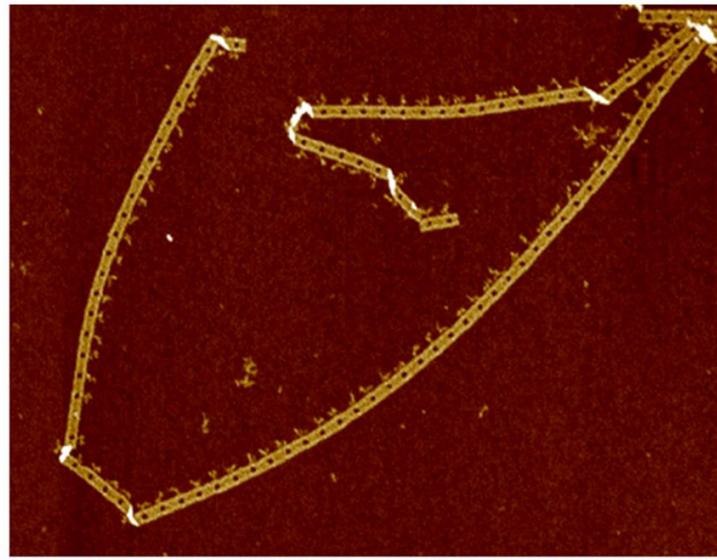

0.0

3.5μm

Figure S4: AFM images of one-dimensional rectangular origami (1DrDO) on mica

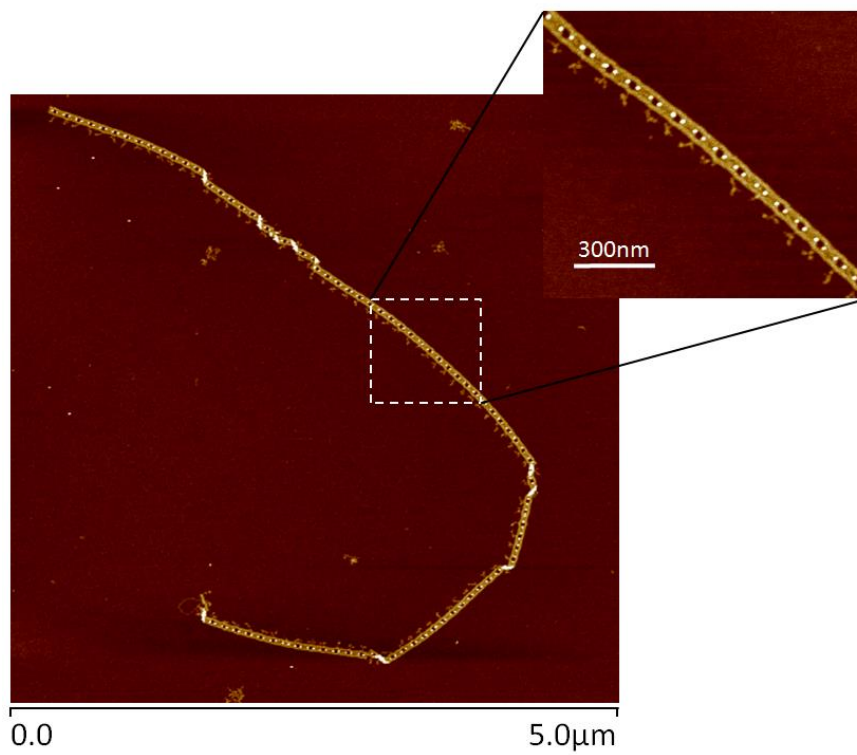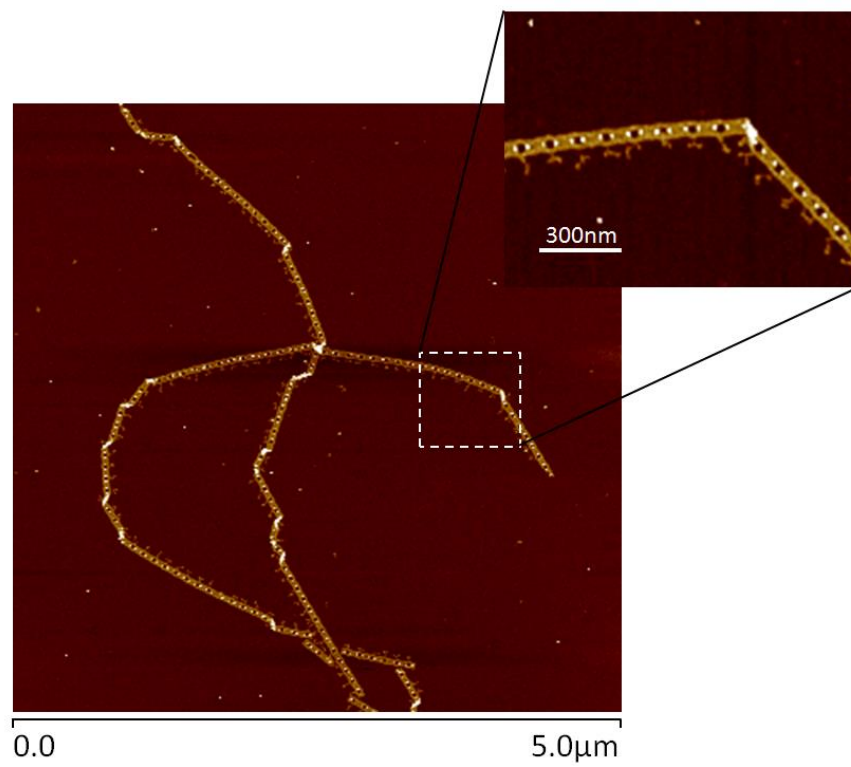

Figure S5: Directed assembly of SA to addresses on 1DrDO

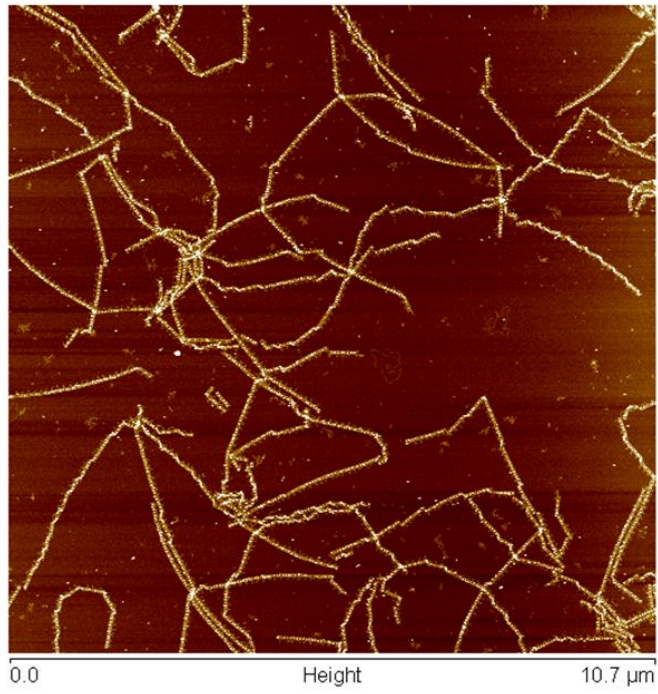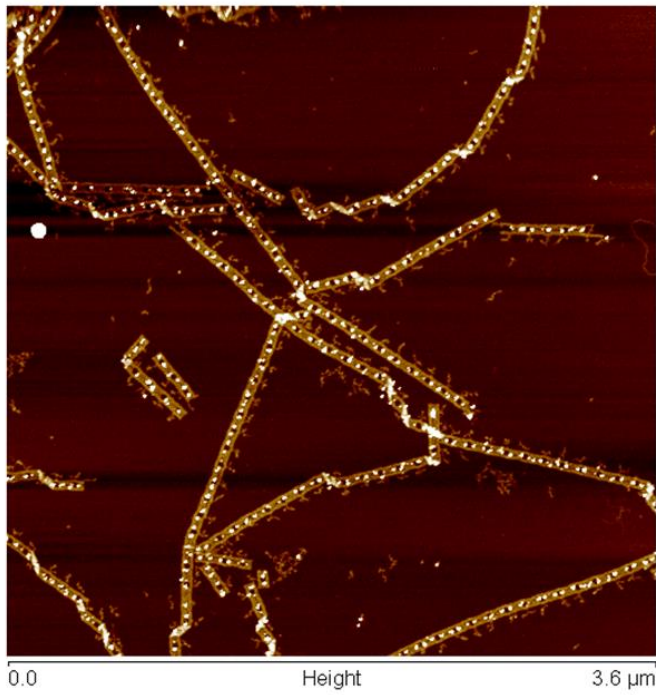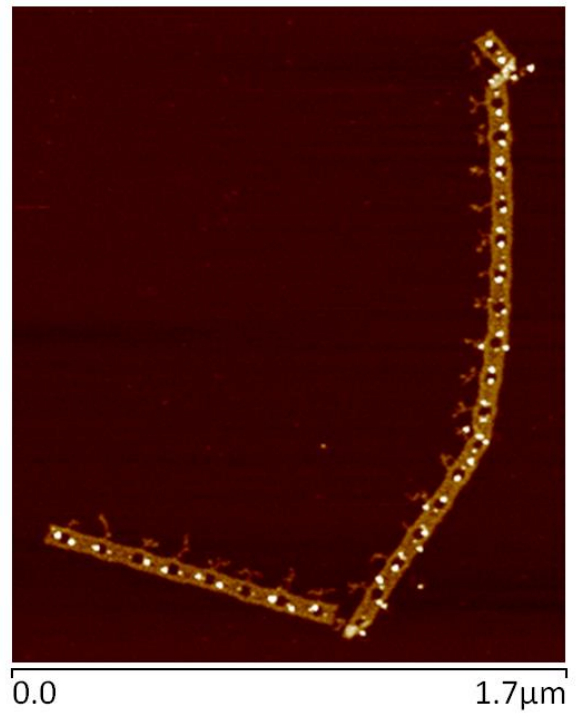

Figure S6: Directed assembly of SA-QDs to addresses on 1DrDO

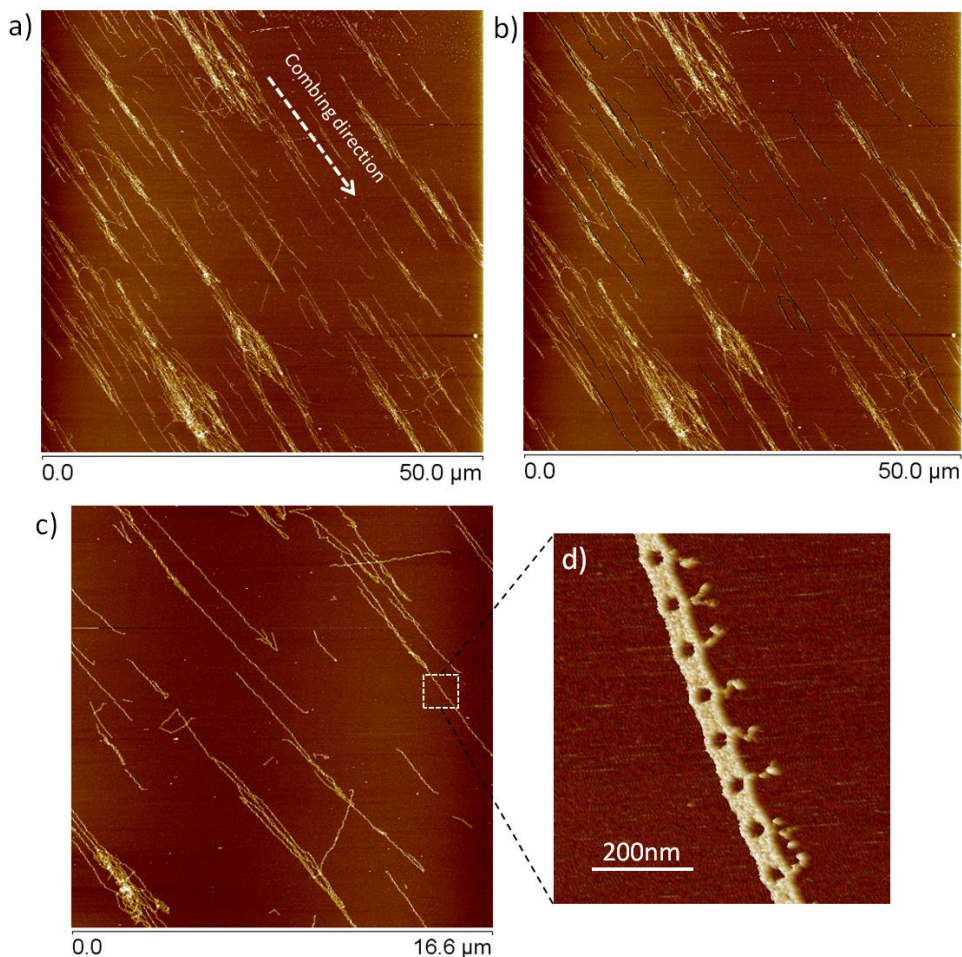

Figure S7: a) Large area AFM image of combed 1DrDO on mica; arrow indicates the combing direction; b) NIH ImageJ software was used to analyze 1DrDOs to determine length distribution (mean and standard deviation value) for apparently single constructs. Black overlay lines indicate which 1DrDO were analyzed; c) different region of combed 1DrDO; d) inset shows high resolution AFM image of the combed 1DrDO construct.

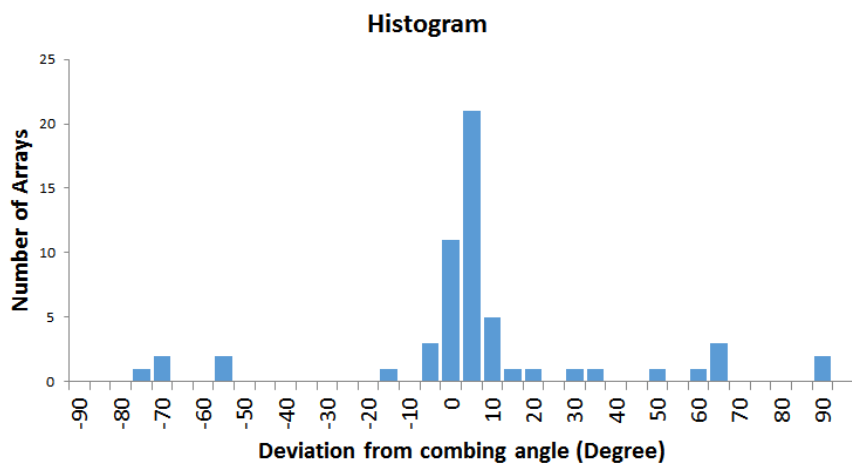

Figure S8: The bins at the center of this histogram show apparent normal distribution of the origami chain alignment dominated by combing while outliers at both extremes likely indicate other forces at work. N=58 number of origami chains were analyzed. If we take  $\pm 10$  degree as successful chain alignment than we see that 77% (40/58) are aligned along flow direction.

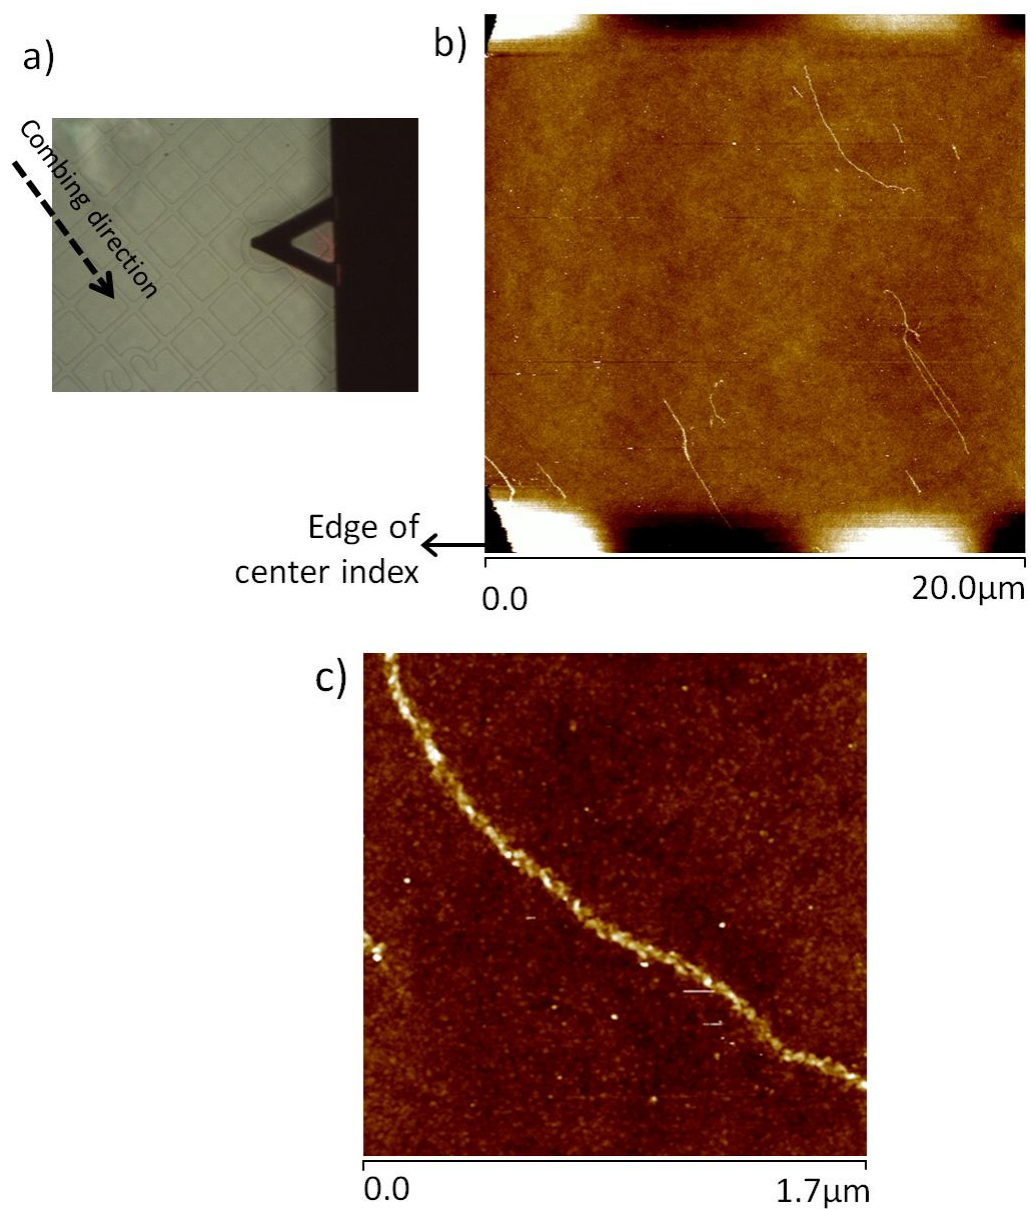

Figure S9: a) Arrow indicates the combing direction on indexed AP-glass; Light microscope image was taken during AFM imaging in air; b) low magnification AFM image of combed 1DrDO; c) high resolution AFM image showing a single 1DrDO construct.



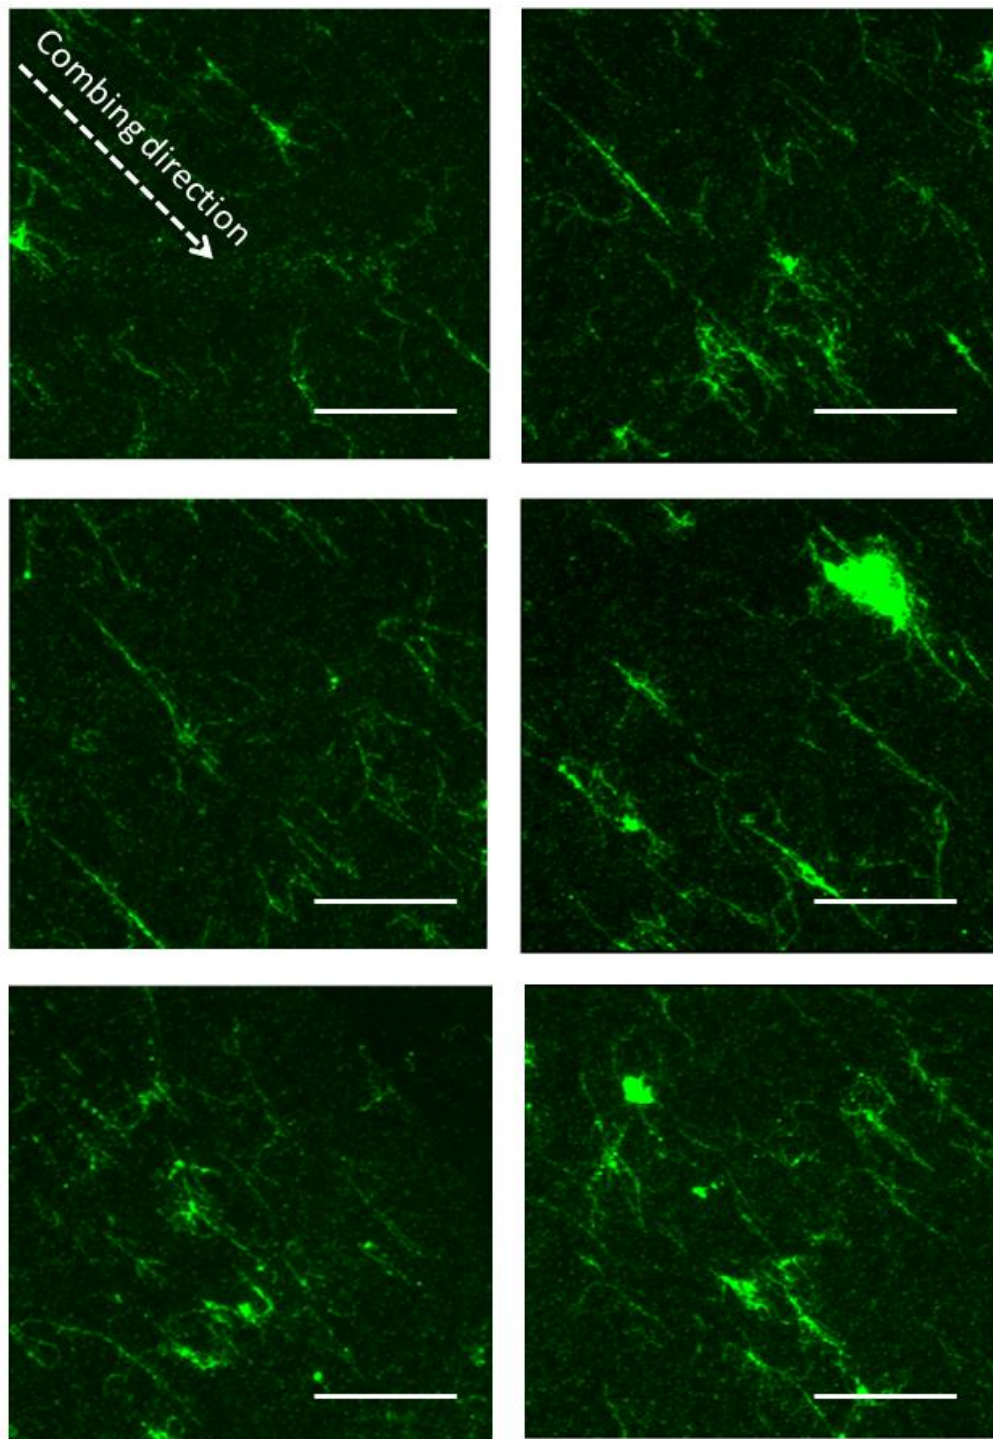

Figure S10: Fluorescence microscopy images of combed sQD-1DrDO construct on AP-glass; Scale bar 20 $\mu$ m

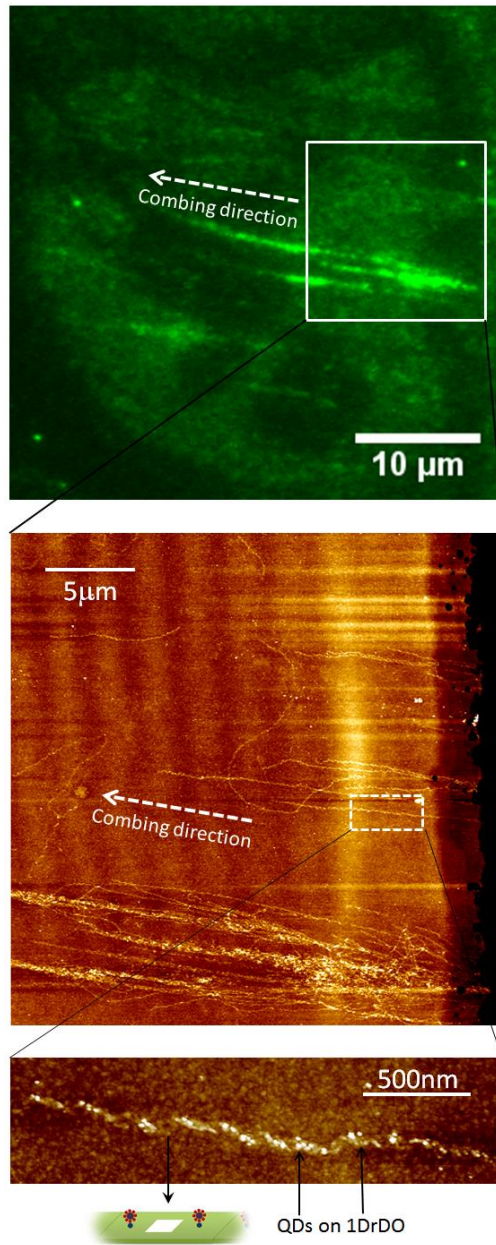

Figure S10. Wide range of Fluorescence microscopy and high resolution of AFM and of the same region of combed sQD-1DrDO construct on AP-glass.

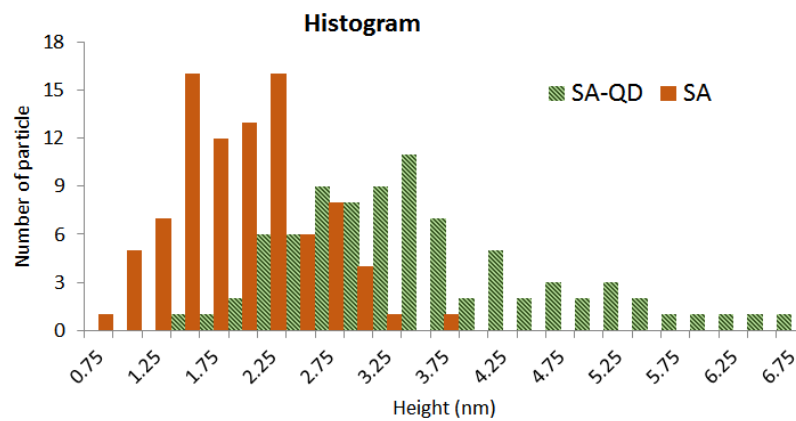

Figure S11: Histogram chart of SA and SA-QDtd height (excluding origami height) on origami chain.

Rectangular origami sequence (Black = m13,  $\ddot{A}$ =5' end;  $\dot{A}$ =3' end)

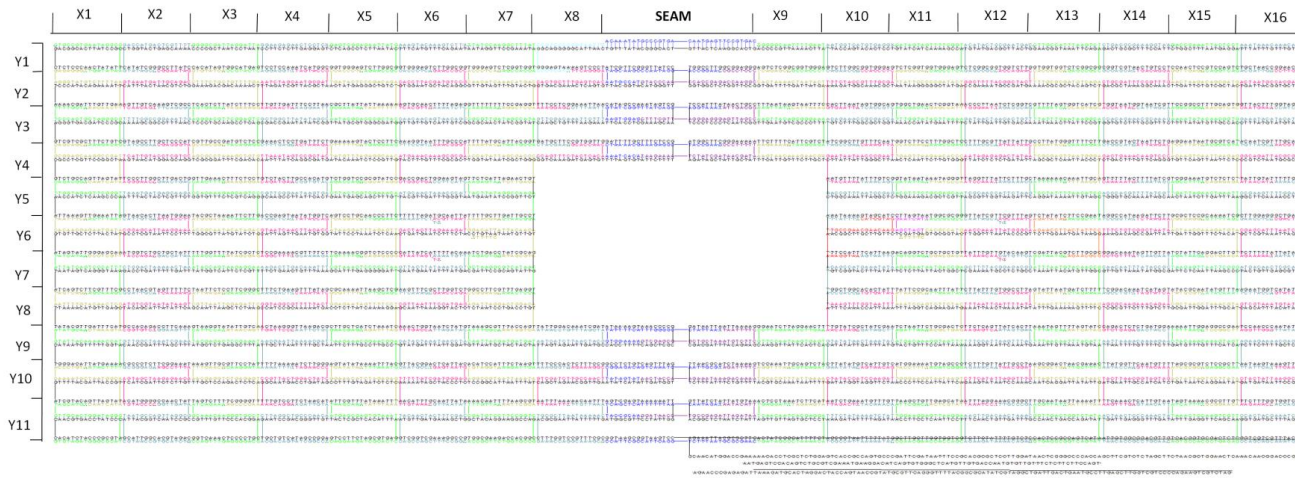

Figure S12: Rectangular origami structure and staple strand positions.

### Staple strand sequences

```

seam-01      CAGTGCCTTGAGTAACAGTGCCCGTATAAACA
seam-02      TACCGTAATAGCAAGCCCAATAGGACCGGAAC
seam-03      CGCTCCCCGGAACACAGGCCACCAACCCATG
seam-04      GAGGTGAAGTATCGGTTTATCAGCAGGTAAT
seam-05      ATTGACGGCCGATTGAGGGAGGGATTGCTTTC
seam-06      AACTAAACTAAAACGAAAGAGGCTACCGAAG
seam-07      CCCTTTTTATAGCAATAGCTATCTAAAAGAAT
seam-08      AAAAGGTGATTTTCATTTGGGGCCTATTAAT
seam-09      TAATTTTCCTTCTGTAATTCGTCGGCGAGCTG
seam-10      TATGATATCGGAGACAGTCAAATCAATTGCGT
seam-11      AGATTTTCAAAAACAGAAATAAAGAACCATCAA
seam-12      AACGCCATTCAGTCAATTTTTAACAATAGAT
seam-13      AATACATTAATAGATTAGAGCCGTCCAATAGG
seam-14      CCATTCGCCATTCAGGTCTTAAATGCGCGAAC
x01-y01      TGATATAAGCGGATAAGTGCCGTC
x01-y02      ACAACTTAATTTCTGTATGGGAGAGAGGGT
x01-y03      AAAGACAGGCGGGATCGTCAACCTTTTGCTA
x01-y04      CAATCATATAGCCGGAACGAGGCGCAGCAGCG
x01-y05      ACTTTAATTGGGCTTGAGATGGTTCAGACGGT
x01-y06      CCTTCGTTATAGTAAGAGCAACTAATTTCA
x01-y07      AGCAAAGCTTTACCCTGACTATTATATCATAA
x01-y08      CTAAAGTAGCTCAACATGTTTTAATAGTCAGA
x01-y09      ATACTTTTTACAAAAACATTATGATATGCAA
x01-y10      CAATCATAACGGTAATCGTAAAACACCCTGTA
x01-y11      GTGTAGATGGGCGCATGGGATAGGTCACGTTGTAGCATGT
x02-y01      TTTTGCTCAGTACCAGGTATAGCC
x02-y02      CGGAATAGCAGACGTTAGTAAATGTCAACAGT
x02-y03      TTCAGCGGTTAAAGGCCGCTTTTCATCGGAA
x02-y04      CGAGGGTACCTGCTCCATGTTACTAGGGAACC
x02-y05      GAAGTACAGAACGAGTAGTAAATCATTGTGA
x02-y06      ATTACCTTAAAGGAATTACGAGGCTACCAGAC
x02-y07      GACGATAAAATCAAAAATCAGGTCCGATTGCA
x02-y08      TCAAAAAGTGAATATAATGCTGTACGGTGTCT
x02-y09      GGAAGTTTAAAGCTAAATCGGTTGGCGGGAGA
x02-y10      AGCCTTAAACAAGAGAATCGATGATGTACCCC
  
```

x02-y11 GGTGATAGCGGATTGACCGTAATCGTAACCGTGCATCTG  
x03-y01 CCGTACTCATTAGGATTAGCGGGG  
x03-y02 TAGAAAGGAGTTTTGTCTGCTTTTCGTGTATCA  
x03-y03 TACAGAGGCTGAGGCTTGCAGGGAAAGTGAGAA  
x03-y04 AAAGAGGAGTGTGCGAAATCCGCGAGCAACGGC  
x03-y05 TTAAGAACCCTGACGAGAAACACCCAACTTTG  
x03-y06 ATAGCGAGCAGATACATAACGCCAATGCGATT  
x03-y07 GAAGCCCGAACGAGAATGACCATAAAACCAA  
x03-y08 ATAACAGTCTTAGAGCTTAATTGCATTAAGAG  
x03-y09 CAAGGATATAAAGCCTCAGAGCATCATTCCAT  
x03-y10 AGCCCAATGAGAGTCTGGAGCAATTTCAACG  
x03-y11 CCAGTTTGAGGGGACGTCCGTGGGAACAAACGATCAGAAA  
x04-y01 ACTCCTCAAGAGAAGGAGGAGGTT  
x04-y02 TAGTACCGTAGCGTAACGATCTAAAACAATA  
x04-y03 AAGGAATTCGGATATATTCGGTCGCTTTGAGG  
x04-y04 ACTAAAGACATCGCCTGATAAATTCAGATGAA  
x04-y05 CGGTGTACAGTGAATAAGGCTTGCTGGCTCAT  
x04-y06 TATACCAGCCACATTCAACTAATGAGGCTTTT  
x04-y07 GCAAAAGATTTAAACAGTTCAGAAAAAGACTT  
x04-y08 CAAATATCTCATTTTTTCGGATGGTGATTCCC  
x04-y09 AATTCTGCTAGCAAAATTAAGCAAAAAATTTT  
x04-y10 TAGAACCCTATCAGGTCATTGCCAACAGGA  
x04-y11 AGATTGTAACAACCCGTCGGATTCACGACAGTATCGGCCT  
x05-y01 AGAACCGCGTATTAAGAGGCTGAG  
x05-y02 TAATTTTTAGACAGCCCTCATAGTCCACCCTC  
x05-y03 TGAGGAAGCATCGCCACGCATAAGCGAATAA  
x05-y04 CGCATAGGCAACGGAGATTTGTATCTTTTTCA  
x05-y05 TTGGGAAGACAAAGCTGCTCATTACAGACCAGG  
x05-y06 CAGAGGGGTTGAGATTTAGGAATATCAGGACG  
x05-y07 ATTCGAGCAATCCCCCTCAAATGCAGTTTTGC  
x05-y08 AGATTTAGTCCTTTTGATAAGAGGGCGTTTTA  
x05-y09 TTTAAATGAGGCAAGGCAAAGAATGAACGAGT  
x05-y10 TATTTAAAGAGAGATCTACAAAGGTCATATAT  
x05-y11 CAGGAAGATCGCACTCTAAATGTGAGCGAGTATAAGCAA  
x06-y01 ATTCTGAAACATGAAACACCCTCA  
x06-y02 GAACCGCCGCCTGTAGCATTCCACTCACGTTG  
x06-y03 AAAATCTCCGACAATGACAACAACCTTTCCATT  
x06-y04 AAACGGGTAGCGCGAAACAAAGTACTGGCTGA  
x06-y07 AAAATGTTTCATAAATATTCATTGTTCAAAGC  
x06-y08 GAACCAGAGAGTACCTTTAATTGCTTTGACCA  
x06-y09 TTAGATACATCCAATAAATCATACCAATGCCT  
x06-y10 GAGTAATGGAGGGTAGCTATTTTTTTGTAAAC  
x06-y11 GTTAATATCAGCTTTCATCAACATCAGCCAGCTTTCCGGC  
x07-y01 AGCCACCATATTTTCGGAACCTATT  
x07-y02 AGGCTCCACAGTACAAACTACAACACCCTCAG  
x07-y03 TAATGCCAATACCGATAGTTGCGCCAAAAAAA  
x07-y04 TCTTGACACCCAGCGATTATACCAAAAATACG  
x07-y05 CTAACGGAAGAACCGGATATTCATAAGAGTAA  
x07-y07 AAACCTCCACAATACTGCGGAATCGTAGACTGG  
x07-y08 AATGGTCAACAGGTCAGGATTAGACCGGAAGC  
x07-y09 AAGATTCATAGTAGTAGCATTAAACATTTTCGCA  
x07-y10 AATTCGCAATAAATTAATGCCGGATGTAGGTA  
x07-y11 ACCGCTTCTGGTGCCGCTGGCCCTTCTGTAGCTTTGTAA  
x08-y01 GTTAATGCCCCCTGCCCCCTCATT  
x08-y02 TTCAGGGACACTGAGTTTCGTCACAAAGGAGC  
x08-y03 CTTTAATTTTTCTTAAACAGCTTGCTACGAAG  
x08-y04 GCACCAACACACTCATCTTTGACC  
x08-y09 ATAACCTGTTTAGCTAGCATCAATTCTACTAAAAAGGGTG  
x08-y10 AGAAAGGCTCAACCGTTCTAGCTGTAAATTT

x08-y11 TTGTTAAACAAAAATAATTCGCGTGAAACCAGGCAAAGCG  
x09-y01 GCCACCCCTAAGTTTTAACGGGGT  
x09-y02 CATTAAGTCATAATCAAAATCACTCAGAGCC  
x09-y03 TAAGCAGAAAAGGGCGACATTCAAAAATTATT  
x09-y04 AGCAAGAAACAATGAAAAGAAAAG  
x09-y09 CGTCAGATTGAGTGAATAACCTTGCCTTAGAATCCTTGAA  
x09-y10 TAGAAGTAAAAATTATTTGCACGTAGGTTTAA  
x09-y11 TGATAGCCCTAAAACAAGGAGCACTAACAACCTGAGGATT  
x10-y01 AGGAGTGTACTGGTAACAGAACCG  
x10-y02 CCACCCCTCAGCGTTTGCCATCTTTGTGAATTA  
x10-y03 TCACCGTCACCAGCGCCAAAGACATAGCCGAA  
x10-y04 CAAAGTTATAAGCCCAATAATAAGTTACAAAA  
x10-y05 TAAACAGCGAGCCTAATTTGCCAGTTATTTT  
x10-y06 CATCGTAGGAACAAGCAAGCCGTTAAAGGTAA  
x10-y07 AGTAATTCATATAAAGTACCGACAACCGACCG  
x10-y08 TGTGATAATTTAATGGTTTGAAAATAACATAGC  
x10-y09 GATAGCTTCATAAATCAATATATGGAATATAC  
x10-y10 AGTAACAGTAGAACCTACCATATCTTAGACTT  
x10-y11 TACAAACATATCTAAAATATCTTTTCGCCATTAAAAATAC  
x11-y01 CACCCCTCATGGCTTTTGATGATAC  
x11-y02 GAGCCATTTTCATAGCCCCCTTATTAGAGCCAC  
x11-y03 AAACCGAGAAAATTCATATGGTTTACCGACTT  
x11-y04 TTATCCCACCCACAAGAATTGAGTCCAGAAGG  
x11-y05 ACCGCGCCAACGAGCGTCTTTCCACATATTAT  
x11-y07 TTAAATAAAGCCAGTAATAAGAGATGTCCAGA  
x11-y08 ACGCTGAGCATCTTCTGACCTAAAATAAGGCG  
x11-y09 ACATCGGGTTAATGAAAACAGTAAGATTAAG  
x11-y10 ACTCGTATTGAATAATGGAAGGGTTACCTTTT  
x11-y11 CGAACGAACCACCAGCAGGAATTGAGGAAGGTATTCGACA  
x12-y01 CAGTAAGCGTCATACAGAGCCGCC  
x12-y02 ACCGAACTCATCGGCATTTTCGGTGGAATT  
x12-y03 AGAGCCAGTTGTCACAATCAATAGGAAACGCA  
x12-y04 ATAATAACAATATCAGAGAGATAAATCCAAAT  
x12-y07 CATGTTTCAGGCAGAGGCATTTTCGGAATAAAC  
x12-y08 ACCGGAATATATTTTAGTTAATTTAAGAGTCA  
x12-y09 ATAGTGAACATTTGAATTACCTTTAGAAACAA  
x12-y10 TAACGGATGTTTGGATTATACTTCTAAATCCT  
x12-y11 TTGCCCGACAAATCAACAGTTGAAAGAAGATAAAACAGAG  
x13-y01 GAGCCGCCTCTGAATTTACCGTTC  
x13-y02 CCAGTAGCAGACTGTAGCGCGTTTACCACCA  
x13-y03 CAAAAGAAACGGAATAAGTTTATTCAAAATCA  
x13-y04 TTTAACGTAGGGTAATTGAGCGCTGGAATACC  
x13-y05 AAGGCTTAGCTACAATTTTATCCTATTTTTTG  
x13-y06 AGAACGCGCCTTATCATTCCAAGAAGATATAG  
x13-y07 CTAGAAAAGCCAACATGTAATTTAGCTAATGC  
x13-y08 AATCATAGGAAAACCTTTTTCAAATCATAATTA  
x13-y09 TTGCTTTGTTACATTTAACAATTTTTTATCAA  
x13-y10 AATTTTAAACAATATAATCCTGATTTTCGCTGA  
x13-y11 GTGAGGCGGTCAGTATATATCTGGTCAGTTGGACGTTATT  
x14-y01 AATGGAAAGCGCAGTCGCCAGCAT  
x14-y02 TGACAGGAGTTTGCCTTTAGCGTCACCATTAC  
x14-y03 CATTAGCAGAAACGCAAAGACACCCTGGCATG  
x14-y04 ATTAAGACCCCTGAACAAAGTCAGCAAAAATG  
x14-y05 AAAATAGCTGCTATTTTGCACCCATCCGGTAT  
x14-y06 TCTAAGAAATAATCGGCTGTCTTTCCTGTTTA  
x14-y07 TCAACAATCGCCATATTTAACAACAGCCTGTT  
x14-y08 TAGTATCAAAGACAAAGAACGCGAGTCTGAGA  
x14-y09 GACTACCTAAGAAAACAAAATTTAAAATACCAA  
x14-y10 GTTACAAAGATGATGGCAATTCATAAGTTTGA

|         |                                          |
|---------|------------------------------------------|
| x14-y11 | GTAACATTATCAAACCCTCAATCATAACACCGCCTGCAAC |
| x15-y01 | CAGGTCAGTCCTCATTAAAGCCAG                 |
| x15-y02 | AACGTCACGTAGCGACAGAATCAAGGTTGAGG         |
| x15-y03 | ACGCAGTAGTGGCAACATATAAAAAGGCCGGA         |
| x15-y04 | CAGAGAGAGAGAATTAACCTGAACATCCTTATT        |
| x15-y05 | GTTTTAGCTTAAATCAAGATTAGTAGCCTTTA         |
| x15-y06 | CCTGAACAATGTAGAAAACCAATCACGCGAGGC        |
| x15-y07 | ATACAAATGGGCTTAATTGAGAATAGATAAGT         |
| x15-y08 | TCCGGCTTATGCAAATCCAATCGCTATGCGTT         |
| x15-y09 | GAGGCGAATGATGAAACAAACATCTTTTAACC         |
| x15-y10 | GCGGAACAATATTCCTGATTATCAATCGCGCA         |
| x15-y11 | AGTGCCACGCTGAGAGTTGCTGAACCTCAAATATCATTTT |
| x16-y01 | TTCACAAACAAATAAAAACGATTGG                |
| x16-y02 | CCTTGATAAGCAGCACCGTAATCACAATGAAA         |
| x16-y03 | CCATCGATAAATACATACATAAAGTGTTAGCA         |
| x16-y04 | AACGTAGAGAAGCGCATTAGACGGATAACATA         |
| x16-y05 | AAAACAGGGGGAGGTTTTGAAGCCGAACCTCC         |
| x16-y06 | CGACTTGCATCCTAATTTACGAGCAGAAAAAT         |
| x16-y07 | AATATCCCCAACGCTCAACAGTATCTTACCA          |
| x16-y08 | GTATAAAGCTATATGTAATGCTGAGGTTGGG          |
| x16-y09 | TTATATAACCTGAGCAAAAAGAAGATTATTCAT        |
| x16-y10 | TTCAATTAGAGCGGAATTATCATCAAGAAACC         |
| x16-y11 | ACCAGAAGAATCTAAAGCATCACCCCAGCAGCAAATGAAA |

#### Sticky End staples

---

|            |                                   |
|------------|-----------------------------------|
| MR-X1-Y1   | ATAGAGAGGGTTGATATAAGCGGATAAGTGCC  |
| MR-X1-Y2   | GATTTTTGCTAAACAACCTAATTTTCTGTATG  |
| MR-X1-Y3   | AGACAGCAGCGAAAAGACAGGCGGGATCGTCAC |
| MR-X1-Y4   | AGGCAGACGGTCAATCATATAGCCGGAACGAG  |
| MR-X1-Y5   | TGCTAATTTCAACTTTAATTGGGCTTGAGATG  |
| MR-X1-Y6   | CCCTATCATAACCCTCGTTATAGTAAGAGCAA  |
| MR-X1-Y7   | AAGGAGTCAGAAGCAAAGCTTTACCCTGACTA  |
| MR-X1-Y8   | TAAATATGCAACTAAAGTAGCTCAACATGTTT  |
| MR-X1-Y9   | TTAACCTGTAATACTTTTTACCAAAAAACATT  |
| MR-X1-Y10  | AAGTAGCATGTCAATCATAACGGTAATCGTAA  |
| MR-X1-Y11  | AAAGTGTAGATGGGCGCATGGGATAGGTCACG  |
| MR-X16-Y1  | GTCTTCACAAACAAATAAAAACGATTGGCCTTG |
| MR-X16-Y2  | GGAAGCAGCACCGTAATCACAATGAAACCATC  |
| MR-X16-Y3  | CCTAAATACATACATAAAGTGTTAGCAAACGT  |
| MR-X16-Y4  | GCGGAAGCGCATTAGACGGATAACATAAAAAAC |
| MR-X16-Y5  | GTTGGGAGGTTTTGAAGCCGAACCTCCCGACT  |
| MR-X16-Y6  | CACATCCTAATTTACGAGCAGAAAAATAATAT  |
| MR-X16-Y7  | TTACCAACGCTCAACAGTATCTTACCAGTATA  |
| MR-X16-Y8  | TAACTATATGTAATGCTGAGGTTGGGTTATA   |
| MR-X16-Y9  | ATGCCTGAGCAAAAAGAAGATTATTCATTTCAA |
| MR-X16-Y10 | AACGAGCGGAATTATCATCAAGAAACCACCAG  |
| MR-X16-Y11 | TTGAATCTAAAGCATCACCCCAGCAGCAAATG  |

#### Biotin labeled staple strands

---

|               |                                               |
|---------------|-----------------------------------------------|
| Biotin-X6-y5  | CCTTCATCTACCCAAATCAACGTAAAAAATCT TT/3BioTEG/  |
| Biotin-X6-y6  | ACGTTAATTAGAAAAGATTCATCAGGTAATAGT TT/3BioTEG/ |
| Biotin-X7-y6  | ATAGCGTCACAACATTA CTTTTT/3BioTEG/             |
| Short-X7-y6   | TTACAGGAAAACGAA                               |
| Biotin-X12-y5 | AAGAAACGGAACTTACCAACGCTCAATAGCA TT/3BioTEG/   |
| Biotin-X12-y6 | AGCAAATCACGGGTATTAACCAAATAAACAA TT/3BioTEG/   |
| Biotin-X11-y6 | CGACGACAGTACCGCAC CTTTTT/3BioTEG/             |
| Short-X11-y6  | TCATCGAGAATCATT                               |

**References:**

- (1) Parabon Computation Inc.
- (2) Liu, W.; Zhong, H.; Wang, R.; Seeman, N. C. *Angew Chem Int Ed Engl* **2011**, *50*, 264.
- (3) Marusyk, R.; Sergeant, A. *Anal Biochem* **1980**, *105*, 403.
- (4) Bensimon, A.; Simon, A.; Chiffaudel, A.; Croquette, V.; Heslot, F.; Bensimon, D. *Science* **1994**, *265*, 2096.
